# Supplementary material
Source: PubMed Central journal article supplement (PMC11649303)
Supplement: NIHMS2036013-supplement-Suppl__Fig__1.pdf [file NIHMS2036013-supplement-Suppl__Fig__1.pdf]

**a**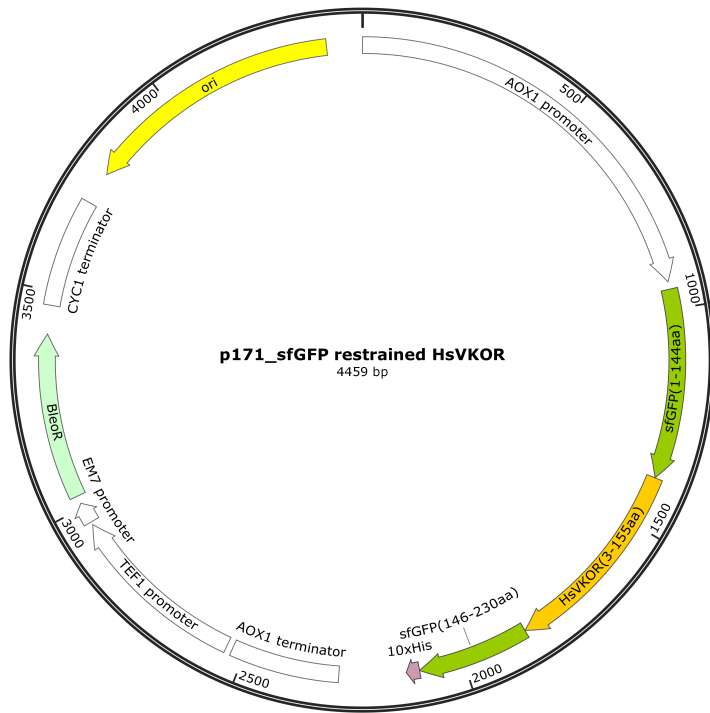**b**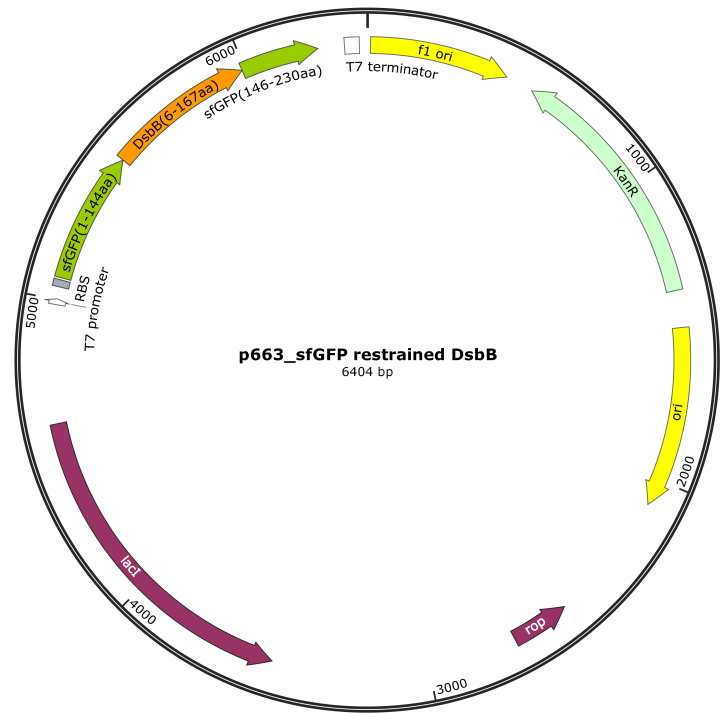

**Supplementary Figure 1. | Examples of sfGFP-restrained membrane protein constructs in different expression vectors. a**, Map of sfGFP-restrained human VKOR in pPICZ-derivatized vector for *Pichia* expression. **b**, Map of sfGFP-restrained DsbB in PET28b vector for *E. coli* expression<sup>31</sup>. The plots are generated with SnapGene viewer. These constructs have been deposited in Addgene, cat. no. 174097 (**a**) and 174099 (**b**).
